# Supplementary material for: Leukocyte Telomere Length Variability as a Potential Biomarker in Patients with PolyQ Diseases
Source: MDPI journal article supplement (doi:10.3390/antiox11081436), 2022-07-24
Supplement: s1 [file s1]

**Supplementary Figures:**

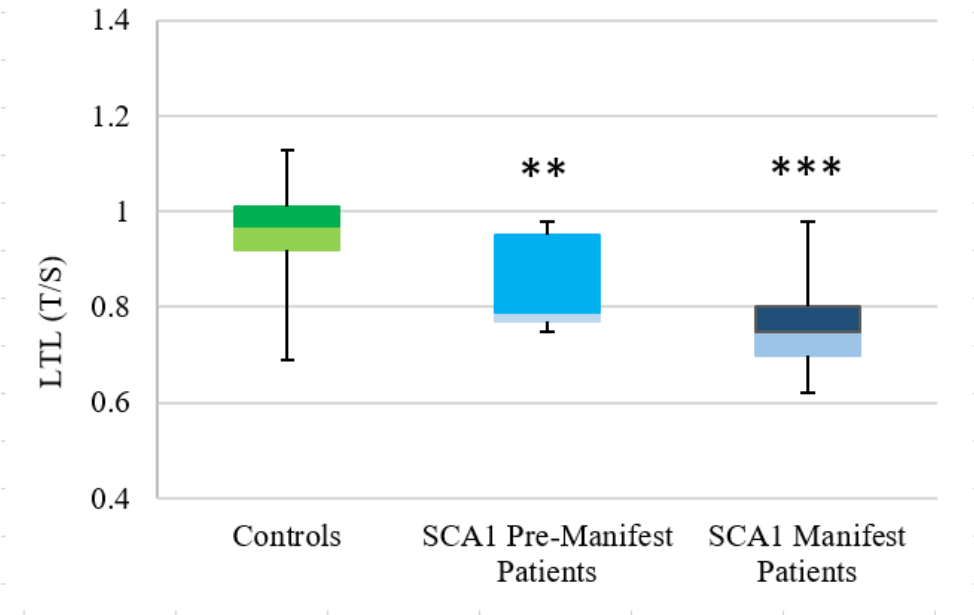

**Supplementary Figure S1. Distribution of LTL in controls, SCA1 pre-manifest and manifest subjects.** Box Plot showing the distribution of LTL (T/S ratio) in controls (median:0.97, Q1:0.92, Q3:1.01), SCA1 pre-manifest patients (median 0.79, Q1:0.77, Q3:0.95) and manifest patients (median:0.75, Q1:0.70, Q3:0.80). (\*\*p<0.01; \*\*\*p<0.001)

|          | SCA1    | SCA2    | SCA3     | HD       |
|----------|---------|---------|----------|----------|
| CONTROLS | p<0.001 | p<0.001 | p= 0.003 | p<0.0001 |
| SCA1     |         | p<0.001 | p=0.002  | p<0.001  |
| SCA2     |         |         | p<0.001  | p<0.0001 |
| SCA3     |         |         |          | p<0.001  |

**Supplementary Table S1** Statistical analysis of each cohort of patients (SCA1,2, 3 and HD vs controls and vs each other. The analysis was carried out using Kruskal-Wallis method, adjusted by Bonferroni error correction.

**A**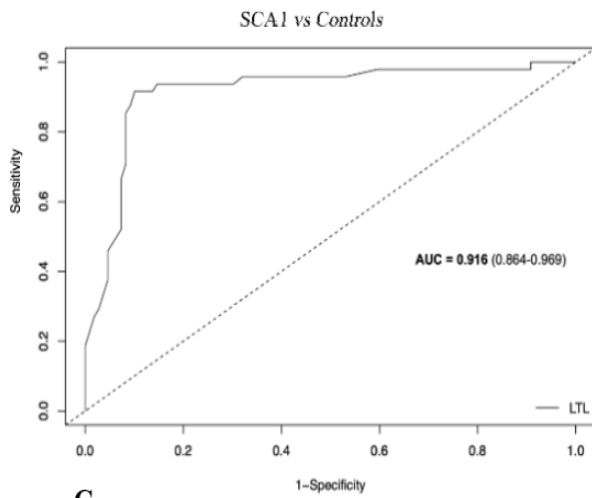**B**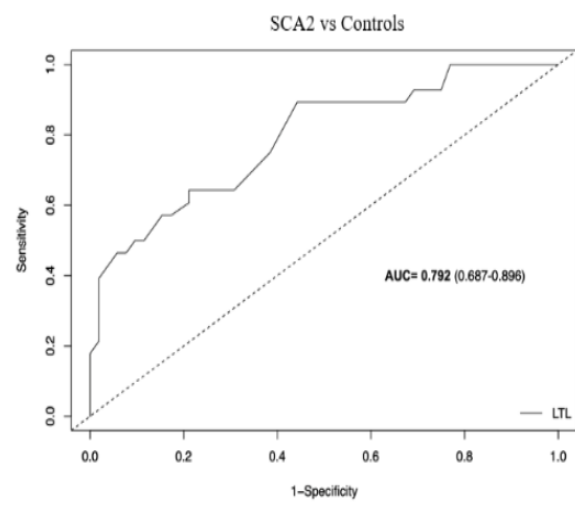**C**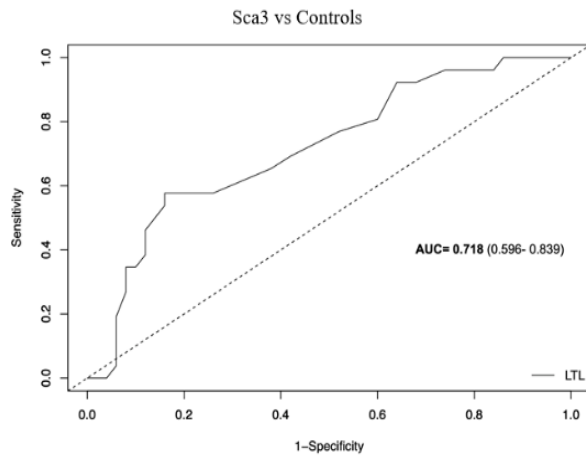

**Supplementary Figure S2: Assessment of LTL as a biomarker of SCAs.** ROC curves for discrimination between patients and controls: (A) SCA1, (B) SCA2, (C) SCA3
